# Supplementary material
Source: Research Square preprint supplement (doi:10.21203/rs.3.rs-9786585/v1)
Supplement: Supplementary file 1 [file 46a572c18580e2226c9b6ae8.docx]

# APPENDICES

#### Appendix I: Demography & Socio-Economic Status of Respondents

| Gender of respondent | | | | | | | | | | | | |
| --- | --- | --- | --- | --- | --- | --- | --- | --- | --- | --- | --- | --- |
|  | | | Frequency | | Percent | | | | | Valid Percent | | Cumulative Percent |
| Valid | Female | | 125 | | 42.1 | | | | | 42.1 | | 42.1 |
| Male | | 165 | | 55.6 | | | | | 55.6 | | 97.6 |
| Prefer not to say | | 7 | | 2.4 | | | | | 2.4 | | 100.0 |
| Total | | 297 | | 100.0 | | | | | 100.0 | |  |
| Age Category of Respondent | | | | | | | | | | | | |
| Valid | 18–25 | | 52 | | 17.5 | | | | | 17.5 | | 17.5 |
| 26–30 | | 89 | | 30.0 | | | | | 30.0 | | 47.5 |
| 31–40 | | 102 | | 34.3 | | | | | 34.3 | | 81.8 |
| 41–50 | | 32 | | 10.8 | | | | | 10.8 | | 92.6 |
| 51–60 | | 14 | | 4.7 | | | | | 4.7 | | 97.3 |
| Above 60 | | 8 | | 2.7 | | | | | 2.7 | | 100.0 |
| Total | | 297 | | 100.0 | | | | | 100.0 | |  |
| Highest Level of Education | | | | | | | | | | | | |
| Valid | No formal Education | | 6 | | 2.0 | | | | | 2.0 | | 2.0 |
| Primary | | 59 | | 19.9 | | | | | 19.9 | | 21.9 |
| Secondary | | 105 | | 35.4 | | | | | 35.4 | | 57.2 |
| Certificate/Diploma | | 60 | | 20.2 | | | | | 20.2 | | 77.4 |
| Degree | | 56 | | 18.9 | | | | | 18.9 | | 96.3 |
| Post-graduate | | 11 | | 3.7 | | | | | 3.7 | | 100.0 |
| Total | | 297 | | 100.0 | | | | | 100.0 | |  |
| Primary Occupation | | | | | | | | | | | | |
| Valid | Student | | 45 | | 15.2 | | | | | 15.2 | | 15.2 |
| Unemployed | | 17 | | 5.7 | | | | | 5.7 | | 20.9 |
| Informal Employment (Casual) | | 102 | | 34.3 | | | | | 34.3 | | 55.2 |
| Self-employed/Business | | 85 | | 28.6 | | | | | 28.6 | | 83.8 |
| Formal Employment (Permanent, Contract, Internship) | | 41 | | 13.8 | | | | | 13.8 | | 97.6 |
| Retired | | 7 | | 2.4 | | | | | 2.4 | | 100.0 |
| Total | | 297 | | 100.0 | | | | | 100.0 | |  |
| Entity Type | | | | | | | | | | | | |
| Valid | Household | 89 | | | | 30.0 | | | 30.0 | | | 30.0 |
| Educational Institution | 31 | | | | 10.4 | | | 10.4 | | | 40.4 |
| Private Business / Office / SME | 94 | | | | 31.6 | | | 31.6 | | | 72.1 |
| Government / Public Office | 31 | | | | 10.4 | | | 10.4 | | | 82.5 |
| Medical / Health Facility | 8 | | | | 2.7 | | | 2.7 | | | 85.2 |
| Informal recycler | 6 | | | | 2.0 | | | 2.0 | | | 87.2 |
| Repair / Workshop (Jua Kali) | 38 | | | | 12.8 | | | 12.8 | | | 100.0 |
| Total | 297 | | | | 100.0 | | | 100.0 | | |  |
| Population of Respondents | | | | | | | | | | | | |
| Valid | Less than 10 | 143 | | | | 48.1 | | 48.1 | | | | 48.1 |
| 10 to 20 | 90 | | | | 30.3 | | 30.3 | | | | 78.5 |
| 21 to 60 | 31 | | | | 10.4 | | 10.4 | | | | 88.9 |
| 61 to 100 | 16 | | | | 5.4 | | 5.4 | | | | 94.3 |
| More than 100 | 17 | | | | 5.7 | | 5.7 | | | | 100.0 |
| Total | 297 | | | | 100.0 | | 100.0 | | | |  |
| Geographic location within Meru Municipality | | | | | | | | | | | | |
| Valid | Meru CBD | | | 98 | | | 33.0 | | | | 33.0 | 33.0 |
| Gakoromone | | | 43 | | | 14.5 | | | | 14.5 | 47.5 |
| Majengo | | | 8 | | | 2.7 | | | | 2.7 | 50.2 |
| Gitimbine | | | 27 | | | 9.1 | | | | 9.1 | 59.3 |
| Milimani/Kinoru | | | 26 | | | 8.8 | | | | 8.8 | 68.0 |
| Gitoro | | | 16 | | | 5.4 | | | | 5.4 | 73.4 |
| Makutano | | | 48 | | | 16.2 | | | | 16.2 | 89.6 |
| Kaaga/Runogone | | | 23 | | | 7.7 | | | | 7.7 | 97.3 |
| Kithoka | | | 8 | | | 2.7 | | | | 2.7 | 100.0 |
| Total | | | 297 | | | 100.0 | | | | 100.0 |  |
